# Supplementary material
Source: publisher figshare collection journal article supplement (https://springernature.figshare.com/articles/dataset/_/7305293)

# Knomics / biota infrastructure

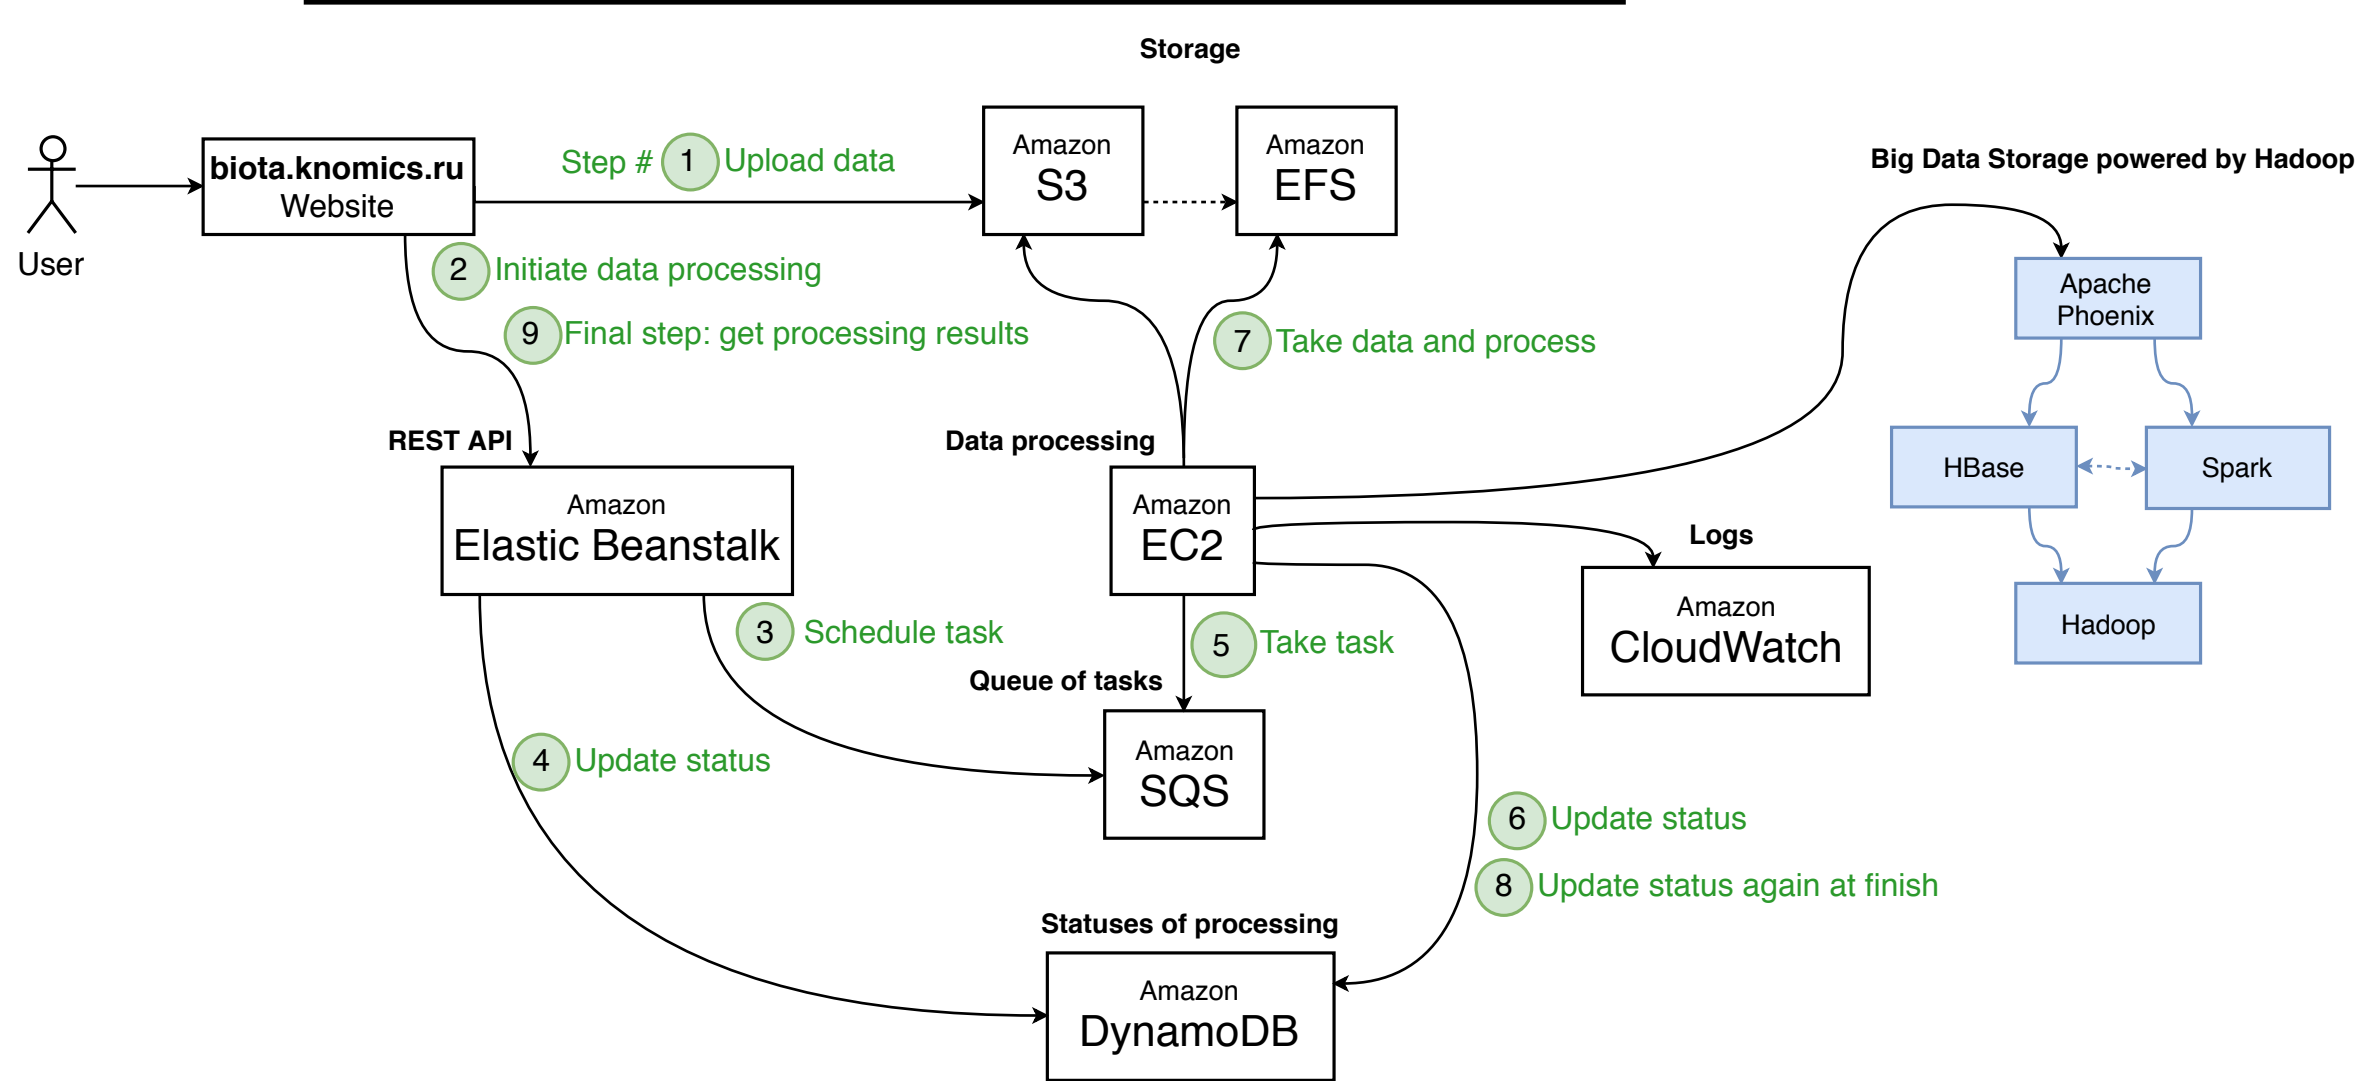

Supplement: Supplementary file [file 13495001]
